# Supplementary material for: Identification and validation of two major QTLs for spikelet number per spike in wheat (Triticum aestivum L.)
Source: Front Plant Sci. 2023 May 10;14:1144486. doi: 10.3389/fpls.2023.1144486 (PMC10208070; doi:10.3389/fpls.2023.1144486)
Supplement: Supplementary file 4 [file Table_2.xlsx]

## Sheet: Table2
Supplementary Table 2 Correlation between agronomic traits of 10-A/B39 population
		TSPN	FSPN
	FSPN	0.967**
	FTN	0.0015669	0.00739676
	PH	0.149265	0.102305
	SL	0.556**	0.548**
	AL	0.0161589	-0.0204473
	SSPN	0.407**	0.161*
	GNS	0.189*	0.295**
	TKW	-.549**	-.527**
	heading period	0.808**	0.773**
	flowering period	0.805**	0.770**
	Note: **Significance at P < 0.01，*Significance at P < 0.05
