# Supplementary material for: Identification and validation of two major QTLs for spikelet number per spike in wheat (Triticum aestivum L.)
Source: Front Plant Sci. 2023 May 10;14:1144486. doi: 10.3389/fpls.2023.1144486 (PMC10208070; doi:10.3389/fpls.2023.1144486)
Supplement: Supplementary file 5 [file Table_3.xlsx]

## Sheet: Supplementary Tables 1
Supplementary Table 3 The landraces used in this study
AS_No.	Accession name	AS_No.	Accession name
AS1558	Kaijiang white wheat	AS1667	Dayi White Wheat
AS1590	Anyue Winter Wheat	AS1668	Xinjin Youmangmai
AS1648	Santai White Wheat	AS1669	Pujiang white flower bald head
AS1073	AS1073	AS1670	Peng County is like a red flower with a bald head
AS1556	Bazhong Tuo Mai	AS1672	Fengdu Pu Scallop
AS1563	Tongjiang fish wheat	AS1674	Fengdu Diwali
AS1573	Changning hexagonal wheat	AS1675	Dianjiang April Yellow
AS1574	Luxian bald wheat	AS1679	Kaixian Luohan Mai
AS1576	Luxian bald safflower wheat	AS1697	Ganning Tibetan Wheat
AS1577	Lu County Monk Mai	AS1698	Nanchong March monk wheat
AS1578	Luxian Zhaoya bald head	AS1699	Nanchong Cerebral Wheat
AS1580	Qingfu early yellow wheat	AS1701	Langzhong Luoxia Mai
AS1581	Ancient Song Dynasty dragon beard	AS1702	Yingshan Brandywheat
AS1582	Ancient Song Dynasty red flower	AS661571	Tongjiang March Yellow
AS1583	Ping Shan Partial Tower	AS661602	Guang'an red wheat
AS1587	Longchang mustard white wheat	AS661626	Xiushan White Shell Sauce
AS1588	Fushun Erleng Whiskey	AS661583	Changning Yellow Wheat
AS1589	Fushun big old husk wheat	AS661655	Qianwei white wheat
AS1591	Anyue Red Wheat	AS661642	A pinch of hair in Xichong
AS1592	Lezhi Safflower	AS661615	Bigfoot fishtail wheat
AS1593	Lezhi Safflower 2	AS661617	Shuangliu Huayang Wheat
AS1594	Lezhi red barley	AS661593	Naxi early yellow wheat
AS1595	Lezhi White Wheat	AS661584	Luxian Yuzui Wheat
AS1596	Zizhong rhubarb robe	AS661634	Yi Dun red mango wheat
AS1597	Zizhong Dahonghua	AS661605	Jiangyou Lushan Mai
AS1598	Zizhong Dahongpao	AS661658	Liang Ping's white shell must be March yellow
AS1599	Mangosteen	AS661616	Hechuan Mai
AS1635	Deyang Tianluchang Wheat	AS661637	Nanchong early winter wheat
AS1641	Tongnan Fishtail Wheat	AS661582	Yibin Wuyangmai
AS1644	Shehong Qinggang Mai	AS661586	Luxian fried dough sticks
AS1646	Zhongjiang dwarf burnt wheat	AS661609	Suining Tuo Tuo Mai
AS1651	Jiangjin safflower wheat	AS661620	Xinjinguang bald head
AS1655	Dazu White Wheat	AS661778	There is no awn barley in Shiquran
AS1656	Copper beam noodles	AS661775	Xinlong Alpine Early Mature Wheat
AS1657	Hechuan Hefang Wheat	AS661599	Dechang jade skin
AS1658	Hechuan red card, etc.	AS661777	Yajiang's Ni Wheat
AS1661	Wenjiang white beard	AS661619	Qionglai Yellow Wheat
AS1664	Guanxian White Flower Dried Wheat Son 1	AS661768	white jade wheat
AS1665	Guanxian White Flower Dried Wheat Son 2	-	-
Note: The AS_No. indicates the landraces were derived from Triticeae Research Institute, Sichuan Agricultural University.
