# Supplementary material for: Identification and validation of two major QTLs for spikelet number per spike in wheat (Triticum aestivum L.)
Source: Front Plant Sci. 2023 May 10;14:1144486. doi: 10.3389/fpls.2023.1144486 (PMC10208070; doi:10.3389/fpls.2023.1144486)
Supplement: Supplementary file 6 [file Table_4.xlsx]

## Sheet: Supplementary Tables 2
		Supplementary Table 4 The cultivars used in this study
Accessions	Origin	Predigree	Released year
Chuanmai 28	Crop Research Institute of Sichuan Academy of Agricultural Sciences	[(Wanya No.2×2874)×(Caucasus×2874)]×Mianyang 19	1997
Chuanmai 29	Crop Research Institute of Sichuan Academy of Agricultural Sciences	(Tai2874×7781-1-2)×(K4×305)	1997
Mianyang 27	Mianyang Academy of Agricultural Sciences	81-5×81-24	1997
Mianyang 28	Mianyang Academy of Agricultural Sciences	T79350-1-4×Mianyang No.11	1997
Chuanmai 30	Crop Research Institute of Sichuan Academy of Agricultural Sciences	Multi-parent aggregated hybridization, original code SW3243	1998
Chuanyu 14	Chengdu Institute of Biology, Chinese Academy of Sciences	9902×21646	1998
Mianyang 26	Mianyang Academy of Agricultural Sciences	Mianyang 81-5×Chuanyu 81-24	1998
Panmai No. 6	Panzhihua Institute of Agricultural Sciences	12632×Xingmai 18	1998
Mianyang 29	Mianyang Academy of Agricultural Sciences	Mianyang 11×Self-bred strain 95-3	1999
Panmai No. 7	Panzhihua Institute of Agricultural Sciences	Xingyuan No. 1 × Mianyang No. 15	1999
Chuannong 7	Sichuan Agricultural University	Mianyang 11×84-2014	2000
Chuanmai 32	Crop Research Institute of Sichuan Academy of Agricultural Sciences	(1900"S"Ning8439)×1900	2001
Chuannong 11	Sichuan Agricultural University	78-5038×85-D·H·5075	2001
Mian Nong No. 7	Mianyang Economic and Technical College	85-42 × Palmers 18	2001
Chuanfu No. 5	Institute of Biotechnology, Sichuan Academy of Agricultural Sciences	Mianyang 88-334×88-11525	2002
Chuanmai 33	Crop Research Institute of Sichuan Academy of Agricultural Sciences	2469×80-28-7	2002
Chuanmai 35	Crop Research Institute of Sichuan Academy of Agricultural Sciences	SW1862×2469	2002
Chuanmai 36	Crop Research Institute of Sichuan Academy of Agricultural Sciences	Milan×SW5193	2002
Chuannong 12	Sichuan Agricultural University	1B/1R	2002
Chuannong 17	Sichuan Agricultural University	91S-23×A302	2002
Chuanyu 16	Chengdu Institute of Biology, Chinese Academy of Sciences	(30020×8619-10)×Jin Mai 30	2002
Mianyang 31	Mianyang Academy of Agricultural Sciences	Mianyang 91-310 × Sichuan value 89-076	2002
Chuanmai 37	Crop Research Institute of Sichuan Academy of Agricultural Sciences	88×88-309	2003
Chuanmai 38	Crop Research Institute of Sichuan Academy of Agricultural Sciences	(Syn-CD769×SW89-3243)×Chuan 6415	2003
Chuanmai 39	Crop Research Institute of Sichuan Academy of Agricultural Sciences	Ink 444×90-7	2003
Chuanmai 41	Crop Research Institute of Sichuan Academy of Agricultural Sciences	91T4135×88 where 8	2003
Chuanmai 42	Crop Research Institute of Sichuan Academy of Agricultural Sciences	(SynCD768×SW3243)×Chuan 6415	2003
Chuannong 18	Sichuan Agricultural University	R164-1×A302-1	2003
Chuannong 19	Sichuan Agricultural University	91S-23×A302	2003
Chuanyu 18	Chengdu Institute of Biology, Chinese Academy of Sciences	(Chuanyu No. 5 × Mo 460) × 94F2-4	2003
Chuanyu 19	Chengdu Institute of Biology, Chinese Academy of Sciences	(Chuanyu No. 5 × Mo 460) × Mianyang 26	2003
Mianyang 30	Mianyang Academy of Agricultural Sciences	(Mianyang 01821×83 13028)×Mianyang 0552014	2003
Mianyang 33	Mianyang Academy of Agricultural Sciences	Imported materials 1294×Mianyang 86-5	2003
Mianyang 35	Mianyang Academy of Agricultural Sciences	05363-8-1×Mianyou No. 2	2003
Neimai No. 8	Neijiang Academy of Agricultural Sciences	Mianyang 26×92R178	2003
Rongmai No. 2	Chengdu Second Agricultural Research Institute	53283 (Anti source from Chuannong 87-085)×90M776 (Anti source from Mexico)	2003
Xichang 18	Xichang Institute of Agricultural Sciences	(5595×medium 7605)×((76-4×new 76-6)×province 301 strain)	2003
West Spoke 12	Xichang Institute of Agricultural Sciences	85γ×876 (Vallarin+60Coγ20KR) was used to obtain high-generation material as female parent, and 85γ-118 (Xichang anti-xiumai+60Coγ20KR seed soaked with “92O” 2000PPM for 24 hours before sowing) was used as male parent. The hybridized seeds were irradiated with 60Coγ20KR and bred for nine generations.	2003
West Comer 1	Southwest University of Science and Technology	Mianyang 88-304×Mexico M-212	2003
Chuanmai 43	Crop Research Institute of Sichuan Academy of Agricultural Sciences	(SynCD768×SW3243)×Chuan 6415	2004
Chuanmai 44	Crop Research Institute of Sichuan Academy of Agricultural Sciences	96 Summer 440 × Guinong 21	2004
Chuannong 21	Sichuan Agricultural University	R841×Qianhui No.3	2004
Liangmai No. 2	Sichuan Agricultural University Wheat Research Institute	Mianyang 26×Self-bred Heterologous No.2 ( (10-A×88-1643)×Chuanyu 12 )	2004
Wheat 37	Mianyang Academy of Agricultural Sciences	96EW37×Mianyang 90-100	2004
Wheat 38	Mianyang Academy of Agricultural Sciences	Self-cultivation intermediate material 07146-12-1×Guinong 19-4	2004
Neimai No. 9	Neijiang Academy of Agricultural Sciences	Mianyang 26×92R178	2004
Xichang 19	Xichang Institute of Agricultural Sciences	Self-bred line 1712×1761	2004
West Spoke 13	Xichang Institute of Agricultural Sciences	85γ-876 × mutant 85γ-118	2004
Xingmai No. 2	Neijiang Academy of Agricultural Sciences	Mianyang 26×92R178	2004
Chuanmai 45	Crop Research Institute of Sichuan Academy of Agricultural Sciences	GH430×SW1862	2005
Chuanmai 46	Crop Research Institute of Sichuan Academy of Agricultural Sciences	Ta193-6280×96-5429	2005
Chuanmai 47	Crop Research Institute of Sichuan Academy of Agricultural Sciences	(Syn-CD786×Mianyang 26)×Mianyang 26	2005
Chuannong 22	Sichuan Agricultural University	R164×86-104	2005
Chuannong 23	Sichuan Agricultural University	R1685×MY26	2005
Kecheng Mai No. 1	Chengdu Institute of Biology, Chinese Academy of Sciences	Guinong 22×Chuanyu 12	2005
Liangmai No. 3	Sichuan Agricultural University Wheat Research Institute	N711×N301-1-1	2005
Wheat 39	Mianyang Academy of Agricultural Sciences	Mianyang 96-78×Guinong 21-1	2005
Wheat 40	Mianyang Academy of Agricultural Sciences	Mianyang 01821×Guinong 19-4	2005
West Comer 2	Southwest University of Science and Technology	Chuanyu 11 × ink 444 selections	2005
Chang Mai 26	Xichang Institute of Agricultural Sciences	The high-generation strain 3461×Xichang 16	2006
Chuanmai 48	Crop Research Institute of Sichuan Academy of Agricultural Sciences	SW8188×SW8688	2006
Chuanmai 49	Crop Research Institute of Sichuan Academy of Agricultural Sciences	Guinong 21×Shenghe 3295	2006
Chuanyu 20	Chengdu Institute of Biology, Chinese Academy of Sciences	SW3243×(35050×21530)	2006
Wheat 41	Mianyang Academy of Agricultural Sciences	(Mianyang 01821×90 Zhong165)×Guinong 19-4	2006
Wheat 42	Mianyang Academy of Agricultural Sciences	Mianyang 96-5×Guinong 21-1	2006
West Spoke 14	Xichang Institute of Agricultural Sciences	Xichang anti-xiumai was selected as the parent, irradiated with 60Co γ-ray 20KR, soaked with "Jiu Er 0" 2000ppm for 24 hours before sowing, and bred after six generations of systematic breeding.	2006
Zimai No. 1	Sichuan Wanfa Seed Development Co., Ltd.	Mianyang 29×Chuanmai 25	2006
Cheng Dianmai No. 1	School of Life Science and Technology, University of Electronic Science and Technology of China, School of Agriculture, Sichuan Agricultural University	MY92-8×91S-5-4	2007
Chuannong 24	College of Agriculture, Sichuan Agricultural University	White grain No. 3 × Yunfan 52894-2	2007
Chuannong 25	Chengdu Zhenglong Plant Breeding Co., Ltd.,	96I-225×91S-5-4	2007
	College of Agriculture, Sichuan Agricultural University
Chuanyu 21	Chengdu Institute of Biology, Chinese Academy of Sciences	Week 88114×G159	2007
Liangmai No. 4	Sichuan Agricultural University Wheat Research Institute	N1491×N1071	2007
Cotton Wheat 1403	Mianyang Academy of Agricultural Sciences	Mianyang 04854×Guinong 21-1	2007
Wheat 45	Mianyang Academy of Agricultural Sciences	07146-12-1×Guinong 19-4	2007
Nei Mai 11	Neijiang Academy of Agricultural Sciences	Mianyang 26×92R178	2007
Rongmai No. 4	Chengdu Second Institute of Agricultural Sciences	96-2547×133-3	2007
Shumai 375	Sichuan Agricultural University Wheat Research Institute	(Mianyang 93-7×92R141)F2×Mianyang 96-324	2007
West Comer 3	Southwest University of Science and Technology	Guinong 21×5575	2007
West Comer 4	Southwest University of Science and Technology	Ink 460×9601-3	2007
Chang Mai 28	Xichang Institute of Agricultural Sciences	Choose 1712 × choose 1761	2008
Chuanmai 50	Crop Research Institute of Sichuan Academy of Agricultural Sciences	Guinong 21×3295	2008
Chuanmai 52	Crop Research Institute of Sichuan Academy of Agricultural Sciences	Chuanmai 36×SW1862	2008
Chuanyu 23	Chengdu Institute of Biology, Chinese Academy of Sciences	R59×(Zheng 9023×H435)	2008
Wheat 185	Mianyang Academy of Agricultural Sciences	Mianyang 96-5×Liaochun No. 10	2008
Wheat 46	Mianyang Academy of Agricultural Sciences	07242-3-1-1×Guinong 21	2008
Rong Mai 757	Chengdu Xingfeng Agricultural Technology Service Co., Ltd.	T274×283	2008
Shumai 482	Sichuan Agricultural University Wheat Research Institute	(Mianyang 93-7×92R141)F2×Mianyang 96-324	2008
West Comer 5	Southwest University of Science and Technology	Guinong 21×96Ⅱ-39	2008
West Comer 6	Southwest University of Science and Technology	Mianyang 95-325×92R-135	2008
Boom 1	Zizhong Ruibo Crop Seed Research Institute	Mianyang 29×Chuanmai 30	2009
Chuanmai 53	Crop Research Institute of Sichuan Academy of Agricultural Sciences	(477×Miannong No.4)×Y314	2009
Chuanmai 55	Crop Research Institute of Sichuan Academy of Agricultural Sciences	SW3243×SW8688	2009
Chuannong 26	Chengdu Zhenglong Plant Breeding Co., Ltd.,	Chuannong 19×R3301	2009
	College of Agriculture, Sichuan Agricultural University
Chuannong 27	Sichuan Agricultural University	Chuannong 19×R3301	2009
Chuanyu 24	Chengdu Institute of Biology, Chinese Academy of Sciences	Week 88114×G394	2009
Jinkemai 33	Pu Chuanyong, Pu Chunlei	Mira×172	2009
Kecheng Mai No. 2	Chengdu Institute of Biology, Chinese Academy of Sciences	Xianyang Dasui/E//Multi-flower-1/3/Guinong 20/4/Mianyang 26	2009
Wheat 43	Mianyang Academy of Agricultural Sciences	07146-12-1 (Mianyang 92-8×88-304)×Guinong 19-4	2009
Wheat 48	Mianyang Academy of Agricultural Sciences	Mianyang 01821×Guinong 19-4	2009
Xianmai 99	Sichuan Que Liang Seed Industry Co., Ltd.	T10090×YT4-8	2009
Yumai No. 1	Sichuan Shenglong Tianxiang Technology Co., Ltd.	R59×4551	2009
Sichuan Reorganization 125	Crop Research Institute of Sichuan Academy of Agricultural Sciences	Chuanmai 42 × Chuanmai 16	2010
Inside 3416	Neijiang Academy of Agricultural Sciences	R57×Fruit 5	2010
Guohao Mai 15	Sichuan Guohao Seed Industry Co., Ltd.	(Mianyang 96-5×Gui 19-4 )×NE	2011
Wheat 228	Mianyang Academy of Agricultural Sciences	(1275-1×Inner 2938)×99-1522	2011
Chuanmai 104	Crop Research Institute of Sichuan Academy of Agricultural Sciences	Chuanmai 42×Chuannong 16	2012
Chuanmai 61	Crop Research Institute of Sichuan Academy of Agricultural Sciences	Zheng 9023/room 3/2/room 3/3/1522	2012
Chuanmai 62	Crop Research Institute of Sichuan Academy of Agricultural Sciences	Fr3×SW1862	2012
Wheat 51	Mianyang Academy of Agricultural Sciences	1275-1×99-1522	2012
Nanmai 302	Nanchong Academy of Agricultural Sciences	16-1×Pan Zaokang	2012
West Comer 7	Southwest University of Science and Technology	Chuanyu 11 × ink 444 selections	2012
Y11-1741	Sichuan Agricultural University Wheat Research Institute	Zimai No.1×Mianyang 2003-1	2012
Chuanmai 63	Crop Research Institute of Sichuan Academy of Agricultural Sciences	01-3570×R138	2013
Chuanmai 64	Crop Research Institute of Sichuan Academy of Agricultural Sciences	Chuanmai 42×Chuannong 16	2013
Chuanmai 65	Crop Research Institute of Sichuan Academy of Agricultural Sciences	98-1231×(Guinong 21×Shenghe 3295)	2013
Cotton Wheat 1618	Mianyang Academy of Agricultural Sciences	1275-1×(Inner 2938×99-1522)	2013
Nanmai 618	Nanchong Academy of Agricultural Sciences	2001-43-1 × Panzakang	2013
Shumai 51	Sichuan Agricultural University Wheat Research Institute	N711×N2401	2013
Shumai 969	Sichuan Agricultural University Wheat Research Institute	SHW-L1/SW8188//Chuanyu 18/3/Chuanmai 42	2013
Specially Researched Mai Nan 88	Nanchong Academy of Agricultural Sciences	16-1×Pan Zaokang	2013
West Comer 8	Southwest University of Science and Technology	97-392×Cloud 225747-5	2013
Chuanmai 1131	Crop Research Institute of Sichuan Academy of Agricultural Sciences	01-3570×R138	2014
Chuanmai 1145	Crop Research Institute of Sichuan Academy of Agricultural Sciences	01-3570×R138	2014
Chuanmai 1247	Crop Research Institute of Sichuan Academy of Agricultural Sciences	L239-248-5×07225	2014
Chuanmai 66	Crop Research Institute of Sichuan Academy of Agricultural Sciences	(99-1572×98-266)×01-3570	2014
Chuanmai 67	Crop Research Institute of Sichuan Academy of Agricultural Sciences	(99-1572×SW8688)×01-3570	2014
Chuanmai 80	Crop Research Institute of Sichuan Academy of Agricultural Sciences	(Zheng 005×1522)×1522	2014
Chuanmai 90	Crop Research Institute of Sichuan Academy of Agricultural Sciences	(38×99116)×Chuanmai 42	2014
Chuanmai 91	Crop Research Institute of Sichuan Academy of Agricultural Sciences	Neimai No. 8/Zheng 9023//00062/3/Chuanmai 42	2014
Rongchun Nanmai No. 1	Nanchong Academy of Agricultural Sciences,	16-1×Pan Zaokang	2014
	Sichuan Rongchun Seed Industry Co., Ltd.
West Comer 9	Southwest University of Science and Technology	Inner 4301×Mianyang No. 31	2014
Yimai No. 9	Yibin Academy of Agricultural Sciences	R59×Yi97-24	2014
Zhongke Mai 138	Chengdu Institute of Biology, Chinese Academy of Sciences	Chuanmai 42×Chuanyu 16	2014
Zhongke Mai 47	Chengdu Institute of Biology, Chinese Academy of Sciences	(W7268×Durum wheat)×Chuanmai 107	2014
Chuanfu No. 7	Institute of Biotechnology and Nuclear Technology, Sichuan Academy of Agricultural Sciences	02 Zhong 5X×(Yunfan 99G321×Zhengmai 9023), the hybrid contemporary seeds were treated with Co-γ rays and bred by pedigree method	2015
Chuanfu No. 8	Institute of Biotechnology and Nuclear Technology, Sichuan Academy of Agricultural Sciences	39849-14-3×03-DH1959	2015
Chuanmai 68	Crop Research Institute of Sichuan Academy of Agricultural Sciences	(99-1572×98-266)×01-3570	2015
Chuanmai 81	Crop Research Institute of Sichuan Academy of Agricultural Sciences	(SW8019×99-1572)×99-1572	2015
Chuanmai 92	Crop Research Institute of Sichuan Academy of Agricultural Sciences	(Nei Mai No. 8 × Room 3) × Chuan Mai 42	2015
Chuannong 29	Sichuan Agricultural University	(02017×R88)×R131	2015
Chuanyu 25	Chengdu Institute of Biology, Chinese Academy of Sciences	Golden Top - 1×41058	2015
Kecheng Mai No. 4	Chengdu Institute of Biology, Chinese Academy of Sciences	37147×CD02-1574-3	2015
Wheat 112	Mianyang Academy of Agricultural Sciences	Cotton 06-367×99-1522	2015
Nanmai 991	Nanchong Academy of Agricultural Sciences	30-9-1×04-2-33	2015
Nei Mai 366	Neijiang Academy of Agricultural Sciences	Balandal88×Inner 4344	2015
West Comer 10	Wheat Research Institute, Southwest University of Science and Technology	99-55×1257	2015
Chang Mai 33	Xichang Institute of Agricultural Sciences	02 Kam 2 × Chang Mai 26	2016
Chuanmai 601	Crop Research Institute of Sichuan Academy of Agricultural Sciences	(Guinong 21×SW3243)F1×(Chuanmai 42×Chuanmai 44)F1	2016
Chuannong 30	Sichuan Agricultural University Institute of Ecological Agriculture, Sichuan Yicheng Modern Agricultural Technology Co., Ltd.	(03FR1349-1×54789)×Chuannong 27	2016
Chuanyu 26	Chengdu Institute of Biology, Chinese Academy of Sciences	Chuanyu 23/4/G219/3/Chuanyu 16//H5/Roebling	2016
Guohao Mai No. 3	Sichuan Guohao Seed Industry Co., Ltd.	(1227-185×99-1522)×99-1572	2016
Kecheng Mai No. 5	Chengdu Institute of Biology, Chinese Academy of Sciences	37147×Chuanmai 37	2016
Wheat 285	Mianyang Academy of Agricultural Sciences	1275-1×99-1522	2016
Shumai 126	Sichuan Agricultural University Wheat Research Institute	Chuanyu 23×B1291	2016
Shumai 921	Sichuan Agricultural University Wheat Research Institute	030104-13×Inner Mai 11	2016
18 West Comai	Southwest University of Science and Technology	99-55×1257	2016
