# Supplementary material for: Identification and validation of two major QTLs for spikelet number per spike in wheat (Triticum aestivum L.)
Source: Front Plant Sci. 2023 May 10;14:1144486. doi: 10.3389/fpls.2023.1144486 (PMC10208070; doi:10.3389/fpls.2023.1144486)
Supplement: Supplementary file 7 [file Table_5.xlsx]

## Sheet: Supplementary Tables 3
Supplementary Table 5 KASP tag information
Primer name	Primer type	Sequence (5'-3')
KASP-AX-110940063	F-primer-A	GAAGGTGACCAAGTTCATGCTGGACATGCCTAGATCAAGAGCA
	F-primer-B	GAAGGTCGGAGTCAACGGATTGGACATGCCTAGATCAAGAGCC
	R-primer	CCCTGTTTCTTGGCCGCTAA
KASP-AX-109465277	F-primer-A	GAAGGTGACCAAGTTCATGCTGTACGCCGCTCTTTACCATT
	F-primer-B	GAAGGTCGGAGTCAACGGATTGTACGCCGCTCTTTACCATC
	R-primer	AGCGATGTACGAAATTTGCG
KASP-AX-111838578	F-primer-A	GAAGGTGACCAAGTTCATGCTCGATGGGCGCGACACTAA
	F-primer-B	GAAGGTCGGAGTCAACGGATTCGATGGGCGCGACACTAC
	R-primer	GAAAGAGCTATATTTGGCCTTCC
KASP-AX-109785183	F-primer-A	GAAGGTGACCAAGTTCATGCTTCGGAATTCTTTTCTTTCTTACCAC
	F-primer-B	GAAGGTCGGAGTCAACGGATTTCGGAATTCTTTTCTTTCTTACCAA
	R-primer	CGTGTTGGTGAGATGAGGGA
KASP-AX-111096297	F-primer-A	GAAGGTGACCAAGTTCATGCTTAGCTCTGGCACTGCACCC
	F-primer-B	GAAGGTCGGAGTCAACGGATTTAGCTCTGGCACTGCACCG
	R-primer	TGTTAGTCAGAAGTTCGACGC
KASP-AX-111956072	F-primer-A	GAAGGTGACCAAGTTCATGCTGCATGATAGTAGTAGCCCCCG
	F-primer-B	GAAGGTCGGAGTCAACGGATTGCATGATAGTAGTAGCCCCCA
	R-primer	ATTTCAGGGACCAATCGCGG
KASP-AX-89728114	F-primer-A	GAAGGTGACCAAGTTCATGCTGACTTTACCTTGAGATTGCCCG
	F-primer-B	GAAGGTCGGAGTCAACGGATTGACTTTACCTTGAGATTGCCCA
	R-primer	TAGCTATGCTGGTGGATGGC
KASP-AX-109842248	F-primer-A	GAAGGTGACCAAGTTCATGCTGAAAGTTTGTGTCTACTACATGTCG
	F-primer-B	GAAGGTCGGAGTCAACGGATTGAAAGTTTGTGTCTACTACATGTCA
	R-primer	ATGCTCGCACTTATGGGCAT
KASP-35677660	F-primer-A	GAAGGTGACCAAGTTCATGCTAGAGGGAGAGGAGTACTGTGATTAG
	F-primer-B	GAAGGTCGGAGTCAACGGATTAGAGGGAGAGGAGTACTGTGATTAA
	R-primer	ATGGCAGGCTTCGTTTACCA
KASP-45881230	F-primer-A	GAAGGTGACCAAGTTCATGCTTGCTACGCGGGGTGTCAT
	F-primer-B	GAAGGTCGGAGTCAACGGATTTGCTACGCGGGGTGTCAG
	R-primer	CTGAAAGCTGTCTGCAAGCG
