# Supplementary material for: Identification and validation of two major QTLs for spikelet number per spike in wheat (Triticum aestivum L.)
Source: Front Plant Sci. 2023 May 10;14:1144486. doi: 10.3389/fpls.2023.1144486 (PMC10208070; doi:10.3389/fpls.2023.1144486)
Supplement: Supplementary file 8 [file Table_6.xlsx]

## Sheet: Supplementary Tables 4
Supplementary Table 6 Homologous gene alignment of 31 target genes
Gene	Target	Description	Species	Name	Qcovs	Length（bp）	Identity（%）	Evalue
TraesCS2D02G077200	LOC_Os03g17210	Hypothetical conserved gene	Rice	null	96	1006	43.738	0
	LOC_Os05g02580	Protein of unknown function DUF3741 domain containing protein	Rice	null	16	173	45.087	7.41e-24
	LOC_Os02g57140	Protein of unknown function DUF3741 domain containing protein	Rice	null	28	298	31.544	4.72e-18
	AT3G53540		Arabidopsis	TRM19	48	524	29.58	3e-35
	AT4G28760	Protein of unknown function (DUF3741)	Arabidopsis	TRM20	45	494	27.328	1.31e-26
	AT5G43880	Protein of unknown function (DUF3741)	Arabidopsis	TRM21	19	196	31.633	2.57e-19
TraesCS2D02G077400	LOC_Os06g06580	Protein of unknown function DUF569 domain containing protein	Rice	null	97	288	42.014	3.34e-55
	LOC_Os06g06670	Protein of unknown function DUF569 family protein	Rice	null	99	298	41.611	4.14e-51
	LOC_Os06g06680	Protein of unknown function DUF569 domain containing protein	Rice	null	95	293	42.662	9.45e-51
	AT3G28630	AT3G28630	Arabidopsis	null	96	313	25.559	2.05e-11
	AT1G27100	AT1G27100	Arabidopsis	null	87	296	26.689	5.03e-10
	AT1G59710	AT1G59710	Arabidopsis	null	87	299	27.425	3.9e-09
TraesCS2D02G077500	LOC_Os06g06680	Protein of unknown function DUF569 domain containing protein	Rice	null	97	344	34.884	2.99e-41
	LOC_Os05g27890	Protein of unknown function DUF569 domain containing protein	Rice	null	99	360	35.556	2.79e-40
	LOC_Os06g06580	Protein of unknown function DUF569 domain containing protein	Rice	null	96	341	34.018	8.41e-39
	AT1G27100	AT1G27100	Arabidopsis	null	95	352	22.159	1.14e-06
	AT3G28630	AT3G28630	Arabidopsis	null	91	337	25.223	1.2e-06
TraesCS2D02G077900	LOC_Os06g34440	Similar to AFL190Cp	Rice	OsDjC55	87	396	48.232	7.1e-100
	LOC_Os01g27740	Similar to DnAJ-like protein slr0093	Rice	OsDjC6	83	386	36.269	1.94e-62
	LOC_Os11g36960	Heat shock protein DnaJ, N-terminal domain containing protein	Rice	OsDjC76	80	397	34.257	7.97e-60
	AT5G18750	AT5G18750	Arabidopsis	null	73	405	27.901	4.04e-36
	AT5G27240	AT5G27240	Arabidopsis	null	57	210	36.667	4.3e-31
	AT3G06340	AT3G06340	Arabidopsis	null	55	222	36.486	8.42e-30
TraesCS2D02G079600	LOC_Os03g17570	Similar to Two-component response regulator-like PRR73	Rice	OsPRR73	93	695	50.935	0
	LOC_Os07g49460	Pseudo response regulator, Heading date, Long-day repressio	Rice	Hd2	92	394	74.619	0
	AT5G02810	pseudo-response regulator 7	Arabidopsis	PRR7	68	496	41.734	3.98e-87
	AT5G60100	pseudo-response regulator 3	Arabidopsis	PRR3	66	406	41.872	2.41e-67
	AT2G46790	pseudo-response regulator 9	Arabidopsis	PRR9	31	132	57.576	2.23e-49
TraesCS2D02G075700LC	LOC_Os06g28980	Reverse transcriptase domain containing protein	Rice	null	82	439	27.335	3.06e-35
	LOC_Os10g21070	Endonuclease/exonuclease/phosphatase domain containing protein	Rice	null	72	393	23.664	1.49e-24
	LOC_Os06g10390	Endonuclease/exonuclease/phosphatase domain containing protein	Rice	null	58	312	26.282	6.09e-25
	AT1G43760	AT1G43760	Arabidopsis	null	74	424	26.415	2.71e-30
	AT1G40390	AT1G40390	Arabidopsis	null	56	314	25.159	6.53e-15
TraesCS2D02G080000	LOC_Os07g49400	Ascorbate peroxidase, ROS homeostasis, Chloroplast protection, Carbohydrate metabolism, Plant architecture, Fertility maintenanc	Rice	APX2	98	250	89.6	2.64e-171
	LOC_Os03g17690	Similar to L-ascorbate peroxidase	Rice	OsAPX1	97	249	83.534	1.59e-157
	LOC_Os08g43560	Similar to Peroxisome type ascorbate peroxidase	Rice	OsAPx4	95	242	67.769	2.34e-116
	AT1G07890	ascorbate peroxidase 1	Arabidopsis	APX1	97	248	79.032	3e-151
TraesCS2D02G077100LC	LOC_Os11g41820	Similar to Splicing factor U2af large subunit A	Rice	null	21	104	46.154	3.21e-18
	LOC_Os01g62410	R1R2R3 MYB transcription factor, Stress toleranc	Rice	OsMYB3R-2	8	34	73.529	1.33e-09
	LOC_Os05g38460	Similar to Gag/env/c-myb protein (Fragment)	Rice	null	8	34	58.824	2.26e-06
	AT4G36690	U2 snRNP auxilliary factor, large subunit, splicing factor	Arabidopsis	ATU2AF65A	23	116	46.552	5.46e-18
	AT1G60900	AT1G60900	Arabidopsis	null	24	120	46.667	7.96e-18
TraesCS2D02G081200	LOC_Os04g32050	Similar to OSIGBa0132D06.2 protein	Rice	OsYSL6	97	647	84.699	0
	LOC_Os04g44330	Similar to OSIGBa0153E02-OSIGBa0093I20.16 protein	Rice	OsYSL11	96	650	54.923	0
	LOC_Os04g57840	Similar to H0103C06.1 protein	Rice	OsYSL10	96	645	52.713	0
	AT3G27020	YELLOW STRIPE like 6	Arabidopsis	YSL6	99	673	69.985	0
	AT5G41000	YELLOW STRIPE like 4	Arabidopsis	YSL4	96	645	68.372	0
	AT1G65730	YELLOW STRIPE like 7	Arabidopsis	YSL7	96	647	53.787	0
TraesCS2D02G081400	LOC_Os01g66510	Similar to Seven transmembrane protein Mlo5 (Fragment)	Rice	OsMLO5	98	488	56.967	0
	LOC_Os04g36680	Similar to barley mlo defense gene homolog3	Rice	OsMLO5	89	444	58.784	1.5e-177
	LOC_Os03g03700	Seven transmembrane protein MLO2	Rice	OsMLO2	92	463	44.924	3.62e-121
	AT4G02600	Seven transmembrane MLO family protein	Arabidopsis	MLO1	96	485	54.639	0
	AT2G44110	Seven transmembrane MLO family protein	Arabidopsis	MLO15	98	497	50.503	3.14e-174
	AT4G24250	Seven transmembrane MLO family protein	Arabidopsis	MLO13	91	457	49.453	1.02e-151
TraesCS2D02G077700LC	LOC_Os05g24654	Similar to Transposase	Rice	null	7	101	30.693	1.21e-09
	AT4G10200	AT4G10200	Arabidopsis	null	32	342	41.228	5.04e-74
	AT2G06500	AT2G06500	Arabidopsis	null	25	391	37.852	1.76e-72
	AT1G35150	AT1G35150	Arabidopsis	null	30	456	33.991	1.35e-64
TraesCS2D02G086700	LOC_Os07g49230	Similar to Ubiquitin-activating enzyme E1	Rice	null	100	991	87.487	0
	LOC_Os03g18380	Similar to Ubiquitin-activating enzyme E1	Rice	null	100	991	81.534	0
	LOC_Os11g01510	Similar to Ubiquitin-activating enzyme E1 2	Rice	null	100	991	76.69	0
	AT5G06460	ubiquitin activating enzyme 2	Arabidopsis	UBA 2	99	990	73.03	0
	AT2G30110	ubiquitin-activating enzyme 1	Arabidopsis	UBA1	100	991	73.158	0
	AT2G21470	SUMO-activating enzyme 2	Arabidopsis	SAE2	46	451	30.155	5.32e-41
TraesCS2D02G084600LC	LOC_Os03g31400	Zinc finger, RING/FYVE/PHD-type domain containing protein	Rice	OsPUB1	52	225	65.333	7.52e-91
	AT5G15400	AT5G15400	Arabidopsis	null	52	225	56.444	1.88e-71
TraesCS2D02G084800LC	LOC_Os03g56770	Protein of unknown function DUF295 domain containing protein	Rice	null	99	307	39.088	6.11e-58
	LOC_Os03g56730	Protein of unknown function DUF295 family protein	Rice	null	72	205	45.854	2.19e-51
	LOC_Os11g24940	Protein of unknown function DUF295 domain containing protein	Rice	null	99	341	35.484	1.63e-43
TraesCS2D02G088200	LOC_Os07g49140	Conserved hypothetical protein	Rice	OsSCAR4	87	409	34.474	4.06e-41
	LOC_Os03g18710	Hypothetical conserved gene	Rice	OsSCAR2	63	290	35.862	1.2e-36
	LOC_Os03g60240	Conserved hypothetical protein	Rice	OsSCAR3	42	170	34.118	6.72e-23
	AT2G38440	SCAR homolog 2	Arabidopsis	SCAR2	53	215	35.814	9.66e-29
	AT5G01730	SCAR family protein 4	Arabidopsis	SCAR4	45	179	32.402	2.99e-20
	AT1G29170	SCAR family protein	Arabidopsis	WAVE2	48	194	30.928	1.53e-19
TraesCS2D02G088600	LOC_Os01g06730	Leucine-rich repeat, N-terminal domain containing protein	Rice	null	97	992	64.012	0
	LOC_Os12g10870	Leucine-rich repeat, N-terminal domain containing protein	Rice	null	95	968	57.541	0
	LOC_Os12g11370	Similar to Leucine Rich Repeat family protein, expressed	Rice	null	99	1010	56.04	0
	AT1G47890	receptor like protein 7	Arabidopsis	RLP7	95	1039	34.36	1.5e-132
	AT1G45616	receptor like protein 6	Arabidopsis	RLP6	93	971	33.162	2.52e-118
	AT3G11010	receptor like protein 34	Arabidopsis	RLP34	93	955	33.298	7.62e-117
TraesCS2D02G087800LC	LOC_Os08g04110	Similar to Phosphate/phosphoenolpyruvate translocator protein-like	Rice	null	23	30	90	2.11e-09
	AT3G14410	AT3G14410	Arabidopsis	null	21	28	78.571	9.88e-08
	AT1G53660	AT1G53660	Arabidopsis	null	21	28	78.571	3.61e-07
TraesCS2D02G095800LC	LOC_Os03g57140	Glycolipid transfer protein, GLTP domain containing protein	Rice	null	58	67	76.119	3.46e-30
	LOC_Os03g50280	Similar to predicted protein	Rice	null	53	59	45.763	7.92e-11
	AT2G34690	Glycolipid transfer protein (GLTP) family protein	Arabidopsis	ACD11	58	65	61.538	1.16e-21
	AT4G39670	AT4G39670	Arabidopsis	null	51	63	50.794	9.8e-13
TraesCS2D02G091100	LOC_Os05g09280	Phospholipase A2, active site domain containing protein	Rice	null	42	250	71.6	3.67e-118
	LOC_Os05g09150	Similar to transposon protein CACTA, En/Spm sub-class	Rice	null	42	254	66.142	5.13e-110
	LOC_Os01g09220	Similar to cDNA clone:001-117-G12, full insert sequence	Rice	null	46	273	58.242	6.42e-98
	AT5G12010	AT5G12010	Arabidopsis	null	34	248	56.452	5.21e-91
	AT4G29780	AT4G29780	Arabidopsis	null	38	274	51.095	3.77e-88
	AT4G38830	cysteine-rich RLK (RECEPTOR-like protein kinase) 26	Arabidopsis	CRK26	41	317	35.016	2.71e-50
TraesCS2D02G091400	LOC_Os07g49110	Similar to D-alanine--D-alanine ligase B (EC 6.3.2.4) (D-alanylalanine synthetase B) (D-Ala-D-Ala ligase B)	Rice	null	93	877	84.493	0
	AT3G08840	AT3G08840	Arabidopsis	null	66	503	60.437	0
TraesCS2D02G092100	LOC_Os07g49080	Glycosyl-phosphatidyl inositol-anchored, plant domain containing protein	Rice	null	93	619	68.821	0
	LOC_Os03g18910	COBRA-like protein 7 precursor	Rice	null	93	621	62.48	0
	LOC_Os06g47110	Similar to COBRA-like protein 10 precursor	Rice	null	93	618	45.955	0
	AT4G16120	COBRA-like protein-7 precursor	Arabidopsis	COBL7	94	629	48.808	0
	AT5G49270	COBRA-like extracellular glycosyl-phosphatidyl inositol-anchored protein family	Arabidopsis	SHV2	96	645	45.736	0
	AT3G16860	COBRA-like protein 8 precursor	Arabidopsis	COBL8	99	667	45.727	0
TraesCS2D02G092700	LOC_Os07g49020	Protein of unknown function DUF3511 domain containing protein	Rice	null	100	96	56.25	1.23e-24
	LOC_Os03g19040	Protein of unknown function DUF3511 domain containing protein	Rice	null	58	48	75	3.34e-18
	LOC_Os05g28840	Protein of unknown function DUF3511 domain containing protein	Rice	null	57	47	74.468	1.2e-16
	AT2G47480	AT2G47480	Arabidopsis	null	71	61	54.098	5.68e-16
	AT3G62640	AT3G62640	Arabidopsis	null	93	77	38.961	1.04e-13
	AT5G11970	AT5G11970	Arabidopsis	null	95	79	39.241	1.55e-13
TraesCS2D02G093300	LOC_Os07g49010	BRCT domain containing protein	Rice	null	72	1131	40.141	0
	LOC_Os03g19190	Zinc finger, RING/FYVE/PHD-type domain containing protein	Rice	null	26	392	56.122	2.91e-126
	LOC_Os08g31930	Zinc finger, RING/FYVE/PHD-type domain containing protein	Rice	OsRFP	6	89	30.337	3.46e-11
	AT4G02110	AT4G02110	Arabidopsis	null	29	225	58.667	2.87e-91
	AT1G77320	transcription coactivators	Arabidopsis	MEI1	8	119	31.933	2.5e-11
	AT1G67180	AT1G67180	Arabidopsis	null	4	66	40.909	4.03e-11
TraesCS2D02G100200LC	LOC_Os05g01180	Zinc finger, CCHC retroviral-type domain containing protein	Rice	null	94	141	34.752	1.1e-27
	LOC_Os07g30190	Similar to OSIGBa0136O08-OSIGBa0153H12.1 protein	Rice	null	88	133	23.308	6.84e-09
TraesCS2D02G094100	LOC_Os03g19410	Peptidase S9A, oligopeptidase, N-terminal beta-propeller domain containing protein	Rice	OsPOP7	92	824	69.296	0
	LOC_Os07g48970	Similar to predicted protein	Rice	OsPOP17	17	151	66.225	2.22e-59
	LOC_Os02g18850	Prolyl oligopeptidase family protein, Abiotic stress toleranc	Rice	OsPOP5	29	270	26.296	1.48e-09
	AT2G47390	AT2G47390	Arabidopsis	null	92	822	67.64	0
	AT4G14570	acylaminoacyl-peptidase-related	Arabidopsis	AARE	17	167	28.743	2.9e-11
	AT5G24260	AT5G24260	Arabidopsis	null	16	144	25	8.88e-07
TraesCS2D02G094300	LOC_Os03g56730	Protein of unknown function DUF295 family protein	Rice	null	35	283	26.148	2.93e-07
	AT1G57790	AT1G57790	Arabidopsis	null	47	356	25.281	1.74e-16
	AT1G49360	AT1G49360	Arabidopsis	null	49	377	24.403	1.12e-14
	AT3G18720	AT3G18720	Arabidopsis	null	40	300	23.667	3.4e-12
TraesCS2D02G101600LC	LOC_Os01g68870	Leucine-rich repeat receptor-like kinase, Specification of anther cell identity, Control of early sporogenic development, Initiation of anther wall formatio	Rice	MSP1	73	1292	76.084	0
	LOC_Os02g10100	Similar to Receptor-like kinase (Fragment)	Rice	MSL1	72	1308	62.768	0
	LOC_Os08g25380	BR receptor kinase, Brassinosteroid (BR) perception in the roo	Rice	BRL3	72	1267	34.017	3.67e-159
	AT5G07280	Leucine-rich repeat transmembrane protein kinase	Arabidopsis	EMS1	66	1146	43.979	0
	AT4G20140	Leucine-rich repeat transmembrane protein kinase	Arabidopsis	GSO1	71	1276	32.288	1.87e-168
